# Supplementary figures and images for: The severity of microstrokes depends on local vascular topology and baseline perfusion
Source: eLife journal article supplement (doi:10.7554/elife.60208), 2021-05-18

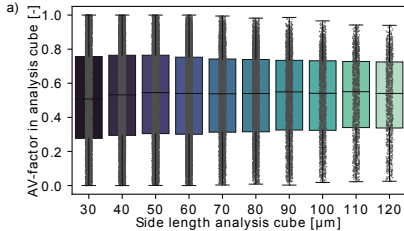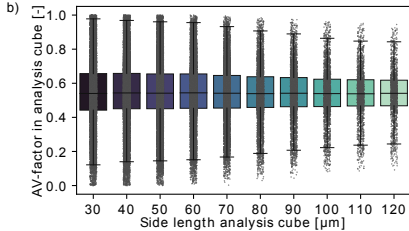

Supplement: supp [file elife-60208-supp-v1.zip]
